1 Generation of two Multipotent Mesenchymal Progenitor Cell Lines Capable of Osteogenic,  
2 Mature Osteocyte, Adipogenic, and Chondrogenic Differentiation

3  
4 <sup>1</sup>Matthew Prideaux<sup>#</sup>, <sup>1,2</sup>Christian S. Wright<sup>#</sup>, <sup>1,3</sup>Megan L. Noonan, <sup>2</sup>Xin Yi, <sup>1,3</sup>Erica L.  
5 Clinkenbeard, <sup>4</sup>Elsa Mevel, Jonathan A. Wheeler, Sharon Byers, <sup>1,4</sup>Uma Sankar, <sup>1,3,5</sup>Kenneth E.  
6 White, <sup>6</sup>Gerald J. Atkins, <sup>1,2,4</sup>William R. Thompson\*

7  
8 <sup>1</sup>Indiana Center for Musculoskeletal Health, Indiana University, Indianapolis, IN 46202

9 <sup>2</sup>Department of Physical Therapy, School of Health and Human Sciences, Indiana University,  
10 Indianapolis, IN 46202

11 <sup>3</sup>Department of Medical and Molecular Genetics, Indiana University, Indianapolis, IN 46202

12 <sup>4</sup>Department of Anatomy, Cell Biology, & Physiology Indiana University, Indianapolis, IN 46202

13 <sup>5</sup>Department of Medicine/Nephrology, Indiana University, School of Medicine, Indianapolis, IN  
14 46202

15 <sup>6</sup>Centre for Orthopaedic & Trauma Research, University of Adelaide, SA, Australia, 5005

16  
17 <sup>#</sup>Authors provided equal contribution to the work.

18  
19 \*Corresponding Author: William R. Thompson, DPT, PhD

20 Email: thompwil@iu.edu

21 Ph.: (317) 278-9619

22  
23 E-mail Addresses: mprideau@iu.edu; wrighch@iu.edu; mlnoonan@iu.edu; xinyi@iupui.edu;  
24 eclinken@iu.edu; elsa.mevel@hotmail.fr; jonwheel@iu.edu; sharon.byers@adelaide.edu.au;  
25 usankar@iupui.edu; kenewhit@iu.edu; gerald.atkins@adelaide.edu.au; thompwil@iu.edu

26  
27 Funding support: This study was supported by F32AR074893-01 to CSW; F31DK122679 to  
28 MLN; R01AR068332 to US; NHMRC APP1106029 and NHMRC APP1080806 to GJA;  
29 R15AR069943-01 and R01AR074473-01 to WRT.

30  
31 Abstract words/characters: x/x; Manuscript words/characters: x/x; Figures (black and white):x;  
32 Figures (color): x; Tables: x

33  
34 Conflict of Interest: KEW receives royalties for licensing FGF23 to Kyowa Hakko Kirin Co., Ltd;  
35 all other authors have no conflicts of interest.

36 Running Title: Generation of two novel MPC cell lines.

37 Author Contributions:

38 MP: collection/assembly of data, data analysis/interpretation, final approval of manuscript

39 CSW: collection/assembly of data, data analysis/interpretation, final approval of manuscript

40 MLN: collection/assembly of data, data analysis/interpretation, final approval of manuscript

41 XY: collection/assembly of data, data analysis/interpretation, final approval of manuscript

42 ELC: concept/design, collection/assembly of data, data analysis/interpretation, manuscript  
43 writing, final approval of manuscript

44 EM: collection/assembly of data, data analysis/interpretation, final approval of manuscript

45 JAW: collection/assembly of data, data analysis/interpretation, final approval of manuscript

46 SB: collection/assembly of data, final approval of manuscript

47 US: concept/design, data analysis/interpretation, final approval of manuscript

48 KW: concept/design, data analysis/interpretation, manuscript writing, final approval of  
49 manuscript

50 GJA: concept/design, collection/assembly of data, data analysis/interpretation, manuscript  
51 writing, final approval of manuscript

52 WRT: concept/design, collection/assembly of data, data analysis/interpretation, manuscript  
53 writing, final approval of manuscript

54  
55

56 Keywords: Mesenchymal stem cells, chondrogenesis, osteogenesis, adipogenesis, cell lines,  
57 FGF23, Sclerostin, Sost

58

## 59 **Abstract**

60 Differentiation of multi-potent mesenchymal progenitor cells give rise to several tissue types  
61 including bone, cartilage, and adipose. In addition to the complication arising from the numerous  
62 spatial, temporal, and hormonal factors that regulate lineage allocation, targeting of these cells  
63 *in vivo* is challenging, making mesenchymal progenitor cell lines valuable tools to study both  
64 tissue development and the differentiated cell types. Mesenchymal stem cells (MSCs) can be  
65 isolated from humans and animals; however, obtaining homogenous, responsive cells in a  
66 reproducible fashion can be problematic. As such, we have developed two novel mesenchymal  
67 progenitor cell (MPC) lines, MPC1 and MPC2, which were generated from the bone marrow of  
68 male C57BL/6 mice. These cells were immortalized using the temperature sensitive large T-  
69 antigen, allowing for thermal control of proliferation and differentiation. Both MPC1 and MPC2  
70 cell lines are capable of osteogenic, adipogenic, and chondrogenic differentiation. Under  
71 osteogenic conditions both cell lines formed discrete mineralized nodules, staining for alizarin  
72 red and alkaline phosphatase, while expressing high levels of osteogenic genes including *Sost*,  
73 *Fgf23*, and *Dmp1*. *Sost* and *Dmp1* mRNA levels were drastically reduced with parathyroid  
74 hormone, thus recapitulating *in vivo* responses. MPC cells secreted both the intact (iFGF23)  
75 and C-terminal (cFGF23) forms of endocrine hormone FGF23, which was upregulated in the  
76 presence of 1,25 dihydroxy vitamin D (1,25D). In addition to osteogenic differentiation, both cell  
77 lines also rapidly entered the adipogenic lineage, expressing several adipose markers after only  
78 4 days in adipogenic media. MPC cells were also capable of chondrogenic differentiation,

79 displaying increased expression of common cartilage genes including aggrecan, sox9, and  
80 cartilage oligomeric matrix protein. With the ability to differentiate into multiple mesenchymal  
81 lineages and mimic *in vivo* responses of key regulatory genes/proteins, MPC cells are a  
82 valuable model to study factors that regulate mesenchymal lineage allocation as well as the  
83 mechanisms that dictate transcription, protein modification, and secretion of these factors.

## 84 **Introduction**

85 The ability of mesenchymal stem cells (MSCs) to differentiate into multiple lineages makes  
86 them a valuable tool for the investigation of tissue development and responses to various  
87 stimuli. While MSCs are present in numerous tissues, bone marrow derived MSCs are essential  
88 for cartilage formation, bone remodeling and repair, and can also form into adipose tissue [1].  
89 As the bone marrow niche contains numerous differentiated and progenitor cell types, studying  
90 the properties of MSCs *in vivo* is challenging. Thus, cultured MSCs are useful to determine the  
91 cell-specific responses of MSCs apart from other cell types; however, there are several  
92 challenges with current cell models.

93 Primary MSCs can be extracted from various tissues, but are most commonly isolated from  
94 adipose and bone marrow [2] in both human and animal models. Although culture conditions  
95 can be optimized to promote growth of MSCs over other cell types, these cultures typically  
96 remain highly heterogenous, containing hematopoietic cells and other cell types. In addition to  
97 the contamination of other cell types, there is wide variation among donors (or animals) and  
98 even between isolations within the same donor. Primary MSC cultures often display differing  
99 growth kinetics and variation in the proportion of cell populations therein. Such variabilities  
100 create challenges in obtaining consistent phenotypic and functional results and may even lead  
101 to incorrect interpretation of data [2].

102 In contrast to primary cells, immortalized cell lines provide greater homogeneity and are thus  
103 capable of producing more consistent experimental outcomes. Numerous human MSC cell lines  
104 are available through commercial vendors, some of which are immortalized, enabling greater  
105 expansion in the laboratory setting. Human MSC cells derive from various tissues, most  
106 commonly adipose aspirates, but also from bone marrow [3]. While the use of human MSCs  
107 provides a powerful tool that may be more easily translated to human studies, human cells often  
108 vary greatly in their responses compared to cells derived from animals. Furthermore, most of  
109 the available MSC lines require complicated protocols to induce differentiation, often including  
110 the use of proprietary cell culture medium, which is both costly and introduces undefined  
111 components (likely various growth factors) that may influence downstream experimental  
112 outcomes. Additionally, the majority of these cell lines require upwards of 4 weeks in culture to  
113 achieve osteogenic and adipogenic differentiation [4-6].

114 Mice are an extremely useful biological model, and the ability to induce transgenic  
115 modifications in mice makes them a powerful tool for discovery. As such, mouse cell lines are  
116 useful for *in vitro* confirmation of *in vivo* results, often providing essential data to translate  
117 findings from animal to human studies. Unfortunately, there are relatively few established  
118 immortalized mouse MSC cell lines, and the lines that are available have similar challenges as  
119 human cell lines. In the absence of readily available MSC cell lines many groups isolate primary  
120 cells for each experiment, requiring the use of numerous mice. A few groups have developed  
121 improved methods for the isolation of MSCs from mice that allow for multiple passages of the  
122 isolated cells [7,8]. This is especially useful to generate cells from mice with transgenic  
123 modifications; however, the limitations with heterogeneity and contamination with other cell  
124 types remain.

125 To overcome some of the common issues with primary MSC cultures, we developed two  
126 novel multi-potent cell lines capable of differentiating into the osteogenic, adipogenic, and

127 chondrogenic lineages. These cells were isolated from the bone marrow of C57BL/6 mice and  
128 are referred to as Murine Progenitor Cells 1 and 2 (MPC1 & MPC2). MPC1 and MPC2 cells  
129 were expanded from single cell clones and harbor the temperature sensitive large T-antigen,  
130 providing a unique ability to regulate proliferation and differentiation based on the incubation  
131 temperature. In addition to the tri-lineage capacity, MPC cells produce very high expression of  
132 several commonly studied molecules. In particular, both MPC1 and MPC2 cells express and  
133 secrete the intact (iFGF23) and C-terminal forms of fibroblast growth factor 23 protein  
134 (cFGF23). While several other cell lines produce *Fgf23* mRNA, there are very few available that  
135 secrete FGF23 protein. As such, these cells provide a useful tool not only to study responses of  
136 mesenchymal progenitors, but also to examine development of multiple tissue types.

137

## 138 **Materials and Methods**

### 139 **Reagents**

140 Cell culture media, trypsin-EDTA, and antibiotics were purchased from Invitrogen (Carlsbad,  
141 CA). Fetal bovine serum (FBS) was purchased from Atlanta Biologicals (Atlanta, GA). Ascorbic  
142 acid,  $\beta$ -glycerophosphate, alizarin red, and the alkaline phosphatase staining kit were obtained  
143 from Sigma Aldrich (St. Louis, MO).

### 144 **Antibodies**

145 Antibodies (Abs) recognizing PPAR $\gamma$  (#2443), GAPDH (#5174), and perilipin (#9349) were  
146 purchased from Cell Signaling (Danvers, MA). Antibody against fatty acid binding protein 4  
147 (FABP4) was purchased from ProSci, Inc. (Poway, CA) (XG6174). The anti-adiponectin Ab  
148 (PA1-054) was obtained from Affinity BioReagents (Rockford, IL). Aggrecan Ab was from  
149 Abcam (ab3778). Antibody against collagen I was purchased from Millipore (AB765P), and the  
150 collagen X Ab was purchased from Calbiochem (234196).

## 151 **Cell Isolation and Culture Conditions**

152 Mesenchymal progenitor cells were isolated from 8-week-old male C57BL/6 mice as  
153 previously described[8]. Briefly, mice were euthanized by CO<sub>2</sub> asphyxiation followed by cervical  
154 dislocation. Femurs and tibias were dissected and kept on ice in Roswell Park Memorial  
155 Institute (RPMI) media with FBS (9%, v/v), horse serum (9%, v/v), and penicillin/streptomycin  
156 (100 µg/ml). Marrow was flushed from long bones and passed through a nylon mesh cell  
157 strainer (70 µm). Cells were spun down (7,000 rpm), resuspended in RPMI media, and plated in  
158 a T175 flask. Cells were cultured for two passages in RPMI media, then passaged twice more in  
159 Iscove's Modified Dulbecco's Medium (IMDM) containing FBS (9%, v/v), horse serum (9%, v/v),  
160 and penicillin/streptomycin (100 µg/ml). Cells then were expanded and cryogenically preserved.  
161 All mouse handling and cell isolation was performed under protocols approved by the Indiana  
162 University Institutional Animal Care and Use Committee.

## 163 **Immortalization Plasmid**

164 The temperature-sensitive large T antigen SV40 sequence, SVU19tsa58, was digested from  
165 pZipSVU19tsa58 plasmid (a gift from Parmjit Jat, UCL, UK) using the BamH1 restriction site.  
166 The sequence was ligated into the pLVX Puro lentiviral plasmid (Clontech, CA) using the same  
167 restriction sites and sequenced to confirm correct orientation. Plasmid DNA was amplified in  
168 One Shot Stbl3 E. coli (Thermo-Fisher Scientific) and purified using a Plasmid Maxiprep kit  
169 (Qiagen).

## 170 **Lentivirus Generation**

171 Human embryonic kidney (HEK) 293 T cells were transiently transfected with the  
172 immortalizing plasmid and plasmids encoding for Tat, Rev, Gag/Pol and VSV-G using Fugene-6  
173 transfection reagent as per the manufacturer's instructions (Roche) for 8 hours. Media was  
174 replaced with DMEM containing FBS (10%, v/v) and cells were incubated for 48 h. The media

175 containing virus particles was collected, centrifuged (2000 rpm) to pellet cell debris, the  
176 supernatant was passed through a filter (0.45  $\mu\text{m}$ ), and stored at  $-80^{\circ}\text{C}$ .

### 177 **Lentiviral Transduction**

178 MSCs were seeded at a density of  $2 \times 10^4$  cells/ $\text{cm}^2$  in T25 flasks the day prior to  
179 transduction. The following day, media was removed and replaced with a mixture of culture  
180 media (50%) and crude virus (50%) containing Polybrene (8  $\mu\text{g}/\text{ml}$ , Sigma). Transduction media  
181 was removed and replaced with fresh culture media 24 h later. After an additional 48 h, fresh  
182 media containing puromycin (2  $\mu\text{g}/\text{ml}$ , Sigma) was added to select for infected cells. Puromycin  
183 selection was maintained for 10 days.

### 184 **Transfection**

185 MPC cells were plated in 6-well plates (100,000 cells/well). After 24 h cells were transfected  
186 with an eGFP vector (3  $\mu\text{g}$ ; Clontech) using Fugene-6 HD reagent according to the  
187 manufacturer's protocol. Cells were incubated at  $33^{\circ}\text{C}$  for the for at least 24 h before being  
188 imaged with a fluorescence on a microscope (Leica).

### 189 **Single Cell Cloning**

190 Stably transfected cells were cloned by limiting dilution in 96-well culture plates. Over 20  
191 clones were created, of which 10 were differentiated in osteogenic media containing alpha  
192 minimal essential media ( $\alpha$ -MEM), FBS (10%, v/v),  $\beta$ -glycerophosphate (5mM) and ascorbic acid  
193 (50 $\mu\text{g}/\text{ml}$ ) for 21 days. The two mesenchymal progenitor cell clones showing the greatest  
194 mineralization, as determined by alizarin red staining, were selected for further characterization  
195 and designated as "MPC1" and "MPC2".

### 196 **Differentiation Conditions**

197 Cells were cultured at  $33^{\circ}\text{C}$  to allow for proliferation. For osteogenic and adipogenic

198 differentiation MPC1 and MPC2 cells were seeded at 6,000 - 10,000 cells/cm<sup>2</sup> in six-well dishes  
199 (Corning, Corning, NY). Cells were incubated overnight (ON) in IMDM media to allow them to  
200 adhere. The following day cells were moved to 37°C and IMDM media was replaced with  
201 osteogenic media consisting of  $\alpha$ -MEM ascorbic acid (50  $\mu$ g/ml) and  $\beta$ -glycerophosphate (10  
202 mM) or adipogenic media containing dexamethasone (0.1  $\mu$ M), insulin (5  $\mu$ g/ml) and  
203 indomethacin (50  $\mu$ M). For osteogenic cultures, media was changed every 48 h. To determine  
204 osteocytic responses of endocrine factors MPC cells were differentiated in osteogenic media for  
205 28 days followed by addition of PTH (50 mM) or 1,25D (10 nM) for 24 hours, after which time  
206 RNA or media were collected for analysis.

207 Induction of chondrogenic differentiation was accomplished by adding 250,000 – 500,000  
208 MPC1 or MPC2 cells to polypropylene tubes containing growth media containing sodium L-  
209 ascorbate (50 nM), insulin (6.25  $\mu$ g/mL), sodium selenite (6.25 ng/mL) and  
210 penicillin/streptomycin (1%, v/v) in DMEM or with chondrogenic media composed of insulin  
211 (6.25  $\mu$ g/mL), transferrin (6.25  $\mu$ g/mL), sodium selenite (6.25 ng/mL), sodium L-ascorbate (50  
212 nM), dexamethasone (10<sup>-8</sup> M), and TGF- $\beta$ 1 (10 ng/mL) in DMEM. Cells were centrifuged for 5  
213 min (250xg), fitted with vented caps and incubated for 48 h in normoxia. After 48 h  
214 chondrogenic cultures were moved to hypoxic conditions (5% O<sub>2</sub>) and cultured for 28 days.

## 215 **Western Blotting**

216 Whole cell lysates were prepared using radio immunoprecipitation assay (RIPA) lysis buffer  
217 (150 mM NaCl, 50 mM Tris HCl, 1 mM EGTA, 0.24% (w/v) sodium deoxycholate, 1% (w/v)  
218 Igepal, pH 7.5) with protease and phosphatase inhibitors. Inhibitors including NaF (1 mM) and  
219 Na<sub>3</sub>VO<sub>4</sub> (1 mM), aprotinin (1  $\mu$ g/ml), leupeptin (1  $\mu$ g/ml), pepstatin (1  $\mu$ g/ml), and  
220 phenylmethylsulfonylfluoride (PMSF, 1 mM) were added fresh, just prior to lysis. Total protein  
221 lysates (20  $\mu$ g) were separated on SDS polyacrylamide gradient gels (4-12%) and transferred to  
222 polyvinylidene difluoride (PVDF) membranes, as described previously[9]. Membranes were  
223 blocked with milk (5%, w/v) diluted in tris-buffered saline containing tween-20 (TBS-T, 0.01%,



224 v/v). Blots then were incubated ON at 4°C with the appropriate primary antibody. Blots were  
225 washed and incubated with horseradish peroxidase-conjugated secondary antibody (1:5000  
226 dilution) (Cell Signaling) at RT for one hour with chemiluminescent detection using ECL Plus  
227 substrate (Amersham Biosciences, Piscataway, NJ). Images were developed and acquired with  
228 an iBright CL1000 machine (Applied Biosystems).

### 229 **Real Time PCR**

230 Total RNA was isolated by using the RNeasy kit (Qiagen, Germantown, MD) as described  
231 previously[10]. mRNA was reverse transcribed, and genes were amplified with a BioRad CFX  
232 Connect™ qPCR machine, using gene-specific primers (Table 1), as previously described[11].  
233 PCR products were normalized to *Gapdh* mRNA expression and quantified using the  $\Delta\Delta CT$   
234 method.

### 235 **Alizarin red and Alkaline phosphatase staining**

236 Mineralization was induced on confluent monolayers in 12-well plates by addition of osteogenic  
237 media. Monolayers were washed with 1X PBS and fixed for 1 hour with cold 70% ethanol, then  
238 washed 3 times with excess dH<sub>2</sub>O prior to addition of 1 mL of 2% w/v Alizarin Red S (pH 4.2)  
239 per well. The plates were incubated in the dark at room temperature for 10 min. After removal of  
240 unincorporated dye, wells were washed three times with dH<sub>2</sub>O, reaspirated, and stored at room  
241 temperature. In identical cultures for the mineralization assay, monolayers of MPC1 and MPC2  
242 cells were washed twice with 1X PBS and fixed for 30 minutes in 4% PFA. PFA was removed  
243 and cells were washed again in 1X PBS, then stained using the Leukocyte Alkaline  
244 Phosphatase Kit (Sigma) as previously described [12]. Plates were stored at room temperature.  
245 Images of wells were taken at 10X magnification on an inverted Leica microscope.

### 246 **FGF23 protein detection**

247 To test FGF23 protein production, MPC1 or MPC2 cells were seeded on 6-well plates and  
248 grown to confluence. Cells were differentiated in osteogenic media for 14 or 21 days then  
249 treated with  $10^{-8}$ M 1,25(OH)<sub>2</sub> vitamin D (Sigma) or vehicle (DMSO) for 24 hrs. The media was  
250 removed centrifuged to remove unattached cells and debris. Media was concentrated in Amicon  
251 Ultra Centrifugal Filters (Milipore) and stored at -80°C. The adherent cells were lysed with 300  
252 µL of 1X Lysis buffer (Cell Signaling Technologies, Inc., Danvers, MA, USA) with 1 µg/mL 4-(2-  
253 aminoethyl) benzenesulfonyl fluoride hydrochloride (AEBSF) protease inhibitor (Sigma-Aldrich,  
254 Inc.) according to the manufacturer's directions. Total cell lysate protein concentrations were  
255 determined with the Better Bradford Kit (Thermo-Fisher Scientific) according to the  
256 manufacturer's instructions. Secreted FGF23 protein was assessed using both the rodent-  
257 specific 'intact' FGF23 ('iFGF23') and 'C-terminal' (or 'total') 'cFGF23' ELISAs (Quidel  
258 Laboratories, Inc.) and normalized to total protein concentration.

### 259 **Histological Processing and Immunohistochemistry**

260 Chondrogenic pellets were fixed in neutral buffered formalin (10%, v/v) for 48 h and  
261 embedded in paraffin. Paraffin embedded pellets were sectioned (10 µm), deparaffinized, and  
262 rehydrated prior to staining with either Safranin-O/Fast Green or Alcian Blue, as previously  
263 described[13].

264 Immunohistochemical staining of chondrogenic pellets was performed by first deparaffinizing  
265 sections and rehydration of sections. Epitope retrieval was achieved by incubation with  
266 chondroitinase ABC (2 mg/ml) for 30 min at RT (aggrecan and collagen X) or by incubation in  
267 citrate buffer (10 mM, pH 6.0) for 20 min at 90°C, followed by a 30 min incubation at room  
268 temperature (RT). Sections were rinsed with distilled/deionized water (ddH<sub>2</sub>O) then inactivated  
269 by exposure to H<sub>2</sub>O<sub>2</sub> for 20 min. at RT and then blocked in PBS containing BSA (1%, w/v) and  
270 goat serum (5%, v/v) for 30 min at RT. Sections were incubated with primary Ab (1:100) in a  
271 humidified chamber at 4°C ON. After rinsing with PBS, horse radish peroxidase-conjugated

272 secondary Ab was added for 1 h at RT and rinsed again with PBS. Sections then were exposed  
273 to 3,3' Diaminobenzidine (DAB) chromogenic substrate, rinsed with ddH<sub>2</sub>O, counterstained with  
274 Gill No. 1 hematoxylin, dehydrated, cleared with Xylene, and mounted on slides prior to  
275 imaging.

## 276 **Statistical Analyses**

277 Data were expressed as means  $\pm$  SE. Statistical significance was analyzed using Student's  
278 t-test or two-way ANOVA, allowing for unequal variance (Prism GraphPad, LA Jolla, CA). All  
279 assays were replicated at least three times, using biological replicates, to assure reproducibility.

## 280 **Results**

### 281 **Osteogenic Induction of MPC1 and MPC2 Cells form Mineralized Nodules**

282 MPC1 and MPC2 cells were exposed to osteogenic media (OM) for 7-28 days, followed by  
283 alizarin red staining for calcium deposition. Compared to the maintenance growth media, when  
284 cultured in osteogenic media both MPC1 and MPC2 cells displayed similar alizarin red staining  
285 when cultured in osteogenic media (Fig. 1A, B). Following 7 days of osteogenic differentiation,  
286 alizarin red staining of MPC2 cells (Fig. 1B) appeared more extensive than that of MPC1 cells  
287 (Fig. 1A). Staining of MPC2 also appeared greater at the 14-day timepoint compared to MPC1;  
288 however, the staining abundance was indistinguishable at 21 and 28 days of differentiation,  
289 where mineralization of nearly the entire well was observed. While the alizarin red stain was  
290 more diffuse across the culture dish in cells exposed to differentiation media for 28 days, distinct  
291 mineralized nodules were apparent at 7, 14, and 21 days of differentiation (Fig. 1).

292 MPC cells exposed to osteogenic differentiation conditions were also stained for the  
293 osteoblast marker alkaline phosphatase (Alkphos). The pattern of Alkphos staining was similar  
294 to that of alizarin red. Following 7 days of osteogenic differentiation MPC1 and MPC2 cells  
295 showed minimal Alkphos staining (Fig. S1A, S1B). At day 14, Alkphos staining was more

296 apparent in cells exposed to osteogenic media in both MPC1 and MPC2 cells compared to  
297 growth media. Staining for Alkphos was increased in MPC1 and MPC2 cells exposed to  
298 osteogenic media at day 21 compared to cells cultured in growth media. Staining was  
299 approximately equal for MPC1 and MPC2 cells at day 21. After 28 days in culture, MPC1 cells  
300 continued to show increased Alkphos staining when cultured in osteogenic media, while MPC1  
301 cells in growth media showed very little staining (Fig. S1A). In contrast to MPC1 cells, MPC2  
302 cells cultured in growth media displayed strong staining for Alkphos, similar to that of MPC2  
303 cells exposed to osteogenic media (Fig. S1B). Taken together, staining for alizarin red and  
304 Alkphos demonstrates that MPC1 and MPC2 cells rapidly differentiate towards the osteogenic  
305 lineage, forming mineralized nodules and producing high levels of Alkphos.

### 306 **Osteogenic Gene Expression**

307 To quantify expression of specific genes that influence osteogenic differentiation MPC1 and  
308 MPC2 cells were cultured in osteogenic media for 0, 7, 14, 21, or 28 days and total RNA was  
309 isolated and reverse transcribed into cDNA followed by amplification of genes by qPCR.  
310 Comparing MPC1 to MPC2 cells, Sclerostin (*Sost*) expression was significantly higher in MPC2  
311 cells at day 0 (1.4-fold) and day 7 (14.6-fold) (Fig. 2A). No significant differences were observed  
312 between cell lines after 14 and 21 days of osteogenic differentiation, whereas MPC2 cells had  
313 86.5% less *Sost* mRNA compared to MPC1 cells at day 28 (Fig. 2A). Compared to day 0, *Sost*  
314 expression was significantly increased in MPC1 cells when cultured for 14 (22-fold) and 28 days  
315 (7,260-fold) in OM. MPC2 cells had significantly increased *Sost* expression at 7 (35-fold), 14  
316 (31-fold), and 21 days (63-fold) of culture in OM, compared to day 0 (Fig. 2A).

317 Dentin matrix protein-1 mRNA (*Dmp1*) was significantly higher in MPC2 cells compared to  
318 MPC1 following 7 (55-fold), 14 (4.8-fold), and 21 days (1.4-fold) of osteogenic differentiation  
319 (Fig. 2B). Compared to day 0, MPC1 cells had significantly increased *Dmp1* expression at 7  
320 (37-fold), 14 (469-fold), 21 (2,237-fold), and 28 days (5,193-fold) of culture in OM. MPC2

321 production of *Dmp1* was significantly increased at 7 (3,412-fold), 14 (3,739-fold), 21 (5,297-  
322 fold), and 28 days (6,436-fold) compared to 0 days of OM culture (Fig. 2B).

323 The expression of fibroblast growth factor-23 (*Fgf23*) mRNA, an endocrine phosphaturic  
324 hormone produced by osteocytes, was significantly higher in MPC2 cells compared to MPC1 at  
325 7 (4-fold), 21 (6.7-fold), and 28 days (4-fold) of culture (Fig. 2C). Compared to day 0, *Fgf23*  
326 mRNA production was significantly increased in MPC1 cells at 14 (52-fold), 21 (73-fold), and 28  
327 days (511-fold). MPC2 cells had significantly increased *Fgf23* expression compared to day 0  
328 when cultured in OM for 7 (54-fold), 14 (238-fold), 21 (1,750-fold), and 28 days (7,429-fold) (Fig.  
329 2C).

330 Another osteoblast/osteocyte marker, extracellular phosphoglycoprotein, encoded by the  
331 *Mepe* gene, was significantly increased in MPC2 cells compared to MPC1 at days 0 (1.4-fold)  
332 and 7 (13.6-fold). After 28 days of culture in OM media *Mepe* expression in MPC1 cells was 12-  
333 fold higher than MPC2 cells (Fig. 2D). Compared to day 0, *Mepe* mRNA was significantly  
334 increased in MPC1 cells with 14 (8-fold) and 28 days (23,052-fold) of osteogenic differentiation.  
335 MPC2 cells expressed significantly increased *Mepe*, compared to day 0, at 7 (32-fold), 14 (37-  
336 fold), 21 (73-fold), and 28 days (1,334-fold) of osteogenic differentiation (Fig. 2D).

337 The transmembrane glycoprotein Podoplanin (*E11*) is highly expressed in early stages of  
338 osteocyte formation[14]. Expression of *E11* was significantly higher in MPC2 cells compared to  
339 MPC1 at day 0 (153-fold), 7 (114-fold) and 14 (12-fold). MPC1 cells produced significantly  
340 higher *E11* levels at 21 (0.55-fold) and 28 days (2.7-fold) of osteogenic culture (Fig. 2E).  
341 Compared to day 0, MPC1 cells produced significantly increased levels of *E11* at 7 (2-fold), 14  
342 (23-fold), 21 (1,849-fold), and 28 days (6,644-fold) of culture. Osteogenic differentiation of  
343 MPC2 cells produced significantly increased *E11* at days 21 (6.7-fold) and 28 (15.7-fold)  
344 compared to day 0 (Fig. 2E).

345 Osteocalcin (*Bglap*) mRNA expression was significantly increased in MPC2 cells compared  
346 to MPC1 at day 0 (2.6-fold), day 7 (11.6-fold), day 14 (17.4-fold), and day 21 (5.8-fold).  
347 Compared to day 0, MPC1 cells had significantly higher levels of *Bglap* at 7 (10.7-fold), 14  
348 (17.4-fold), 21 (120-fold), and 28 days (905-fold) of osteogenic differentiation (Fig. 2F). For  
349 MPC2 cells, *Bglap* expression was significantly increased after 7 (47-fold), 14 (114-fold), 21  
350 (264-fold), and 28 days (463-fold) of exposure to OM (Fig. 2F).

351 Runt-related transcription factor 2 (*Runx2*) is a master regulator of osteogenic  
352 differentiation[15]. Compared to MPC1, MPC2 cells produced significantly greater levels of  
353 *Runx2* at every timepoint surveyed, with the greatest difference being 2-fold (Fig. 2G). In MPC1  
354 cells OM induced significant increases in *Runx2* at each time point, all of which were increased  
355 by approximately 3-fold compared to day 0. MPC2 cells also expressed significantly more  
356 *Runx2* after addition of OM with production increasing about 2.6-fold at every time point  
357 measured compared to day 0 (Fig. 2G).

### 358 **Effects of PTH and 1,25D Treatment**

359 Bone is acutely sensitive to hormonal signals, many of which directly influence lineage  
360 commitment of mesenchymal progenitors. Parathyroid hormone suppresses *Sost/sclerostin*  
361 expression both *in vivo* [16] and *in vitro* [9], whereas 1,25D has been shown to influence  
362 expression of several osteogenic genes, including *Fgf23* [17]. To assess the ability of PTH and  
363 1,25D to regulate expression of osteogenic genes in MPC cells, MPC1 and MPC2 cells were  
364 exposed to differentiation media for 28 days followed by treatment with PTH (50 nM) or 1,25D  
365 (10 nM). PTH significantly suppressed *Sost* mRNA in both MPC1 (99.9%) and MPC2 cells  
366 (98.8%) (Fig. 3A). Treatment with 1,25D did not alter *Sost* mRNA expression in either cell line.  
367 Treatment with PTH virtually abolished *Dmp1* mRNA in both MPC1 (99.2%) and MPC2 (99.4%)  
368 cells, whereas exposure to 1,25D resulted in significantly increased production of *Dmp1* mRNA  
369 by 2.7-fold in MPC1 and 3.7-fold in MPC2 cells (Fig. 3A). In MPC1 cells, treatment with PTH

370 significantly decreased *Fgf23* mRNA expression by 39%, while no changes were observed in  
371 MPC2 cells. Treatment with 1,25D significantly increased *Fgf23* transcripts in both MPC1 (19.8-  
372 fold) and MPC2 (3.9-fold) cells. As previous studies have demonstrated that expression of *Sost*  
373 and *Dmp1* is suppressed by PTH, and 1,25D induces both *Dmp1* and *Fgf23* expression, our  
374 results demonstrate that osteogenic differentiation of MPC cells recapitulates the hormonal  
375 responses of bone.

### 376 **MPC Cells Secrete FGF23 Protein Regulated by 1,25D**

377 While several cell lines produce *Fgf23* mRNA, few have demonstrated the ability to secrete  
378 functional FGF23 protein. As such, we sought to determine not only if MPC cells produced  
379 FGF23 protein, but to quantify the extent to which both intact, bioactive FGF23 (iFGF23) and C-  
380 terminal forms of secreted FGF23 (cFGF23 or “total FGF23” measure both intact and C-terminal  
381 FGF23 proteolytic fragments) were regulated by 1,25D using two distinct ELISAs. After 14 days  
382 of osteogenic differentiation, at baseline (no treatment), MPC1 cells released  $4.24 \times 10^{-5}$  ng/ $\mu$ g of  
383 intact FGF23, as measured by ELISA of the cell media, which was normalized to total cell  
384 protein content. MPC2 cells produced  $5.27 \times 10^{-5}$  ng/ $\mu$ g, which was significantly increased  
385 compared to MPC1 cells, consistent with higher *Fgf23* mRNA content. No significant differences  
386 in intact FGF23 were seen between 14 and 21 days of osteogenic differentiation (Fig. 3B). In  
387 MPC1 cells 1,25D treatment significantly increased secretion of iFGF23 at both 14 (1.8-fold)  
388 and 21 days (3.2-fold) of osteogenic differentiation (Fig. 3B). Exposure to 1,25D increased  
389 iFGF23 production at 14 days in MPC2 cells by 5.7-fold; however, this change was not  
390 significant. A 2-fold increase in intact FGF23 secretion was observed with 1,25D exposure in  
391 MPC2 cells after 21 days of osteogenic culture. Overall, we found that both cell lines secrete  
392 more cFGF23 than iFGF23. Secretion of cFGF23 was increased at 14 (2.5-fold) and 21 days  
393 (2.8-fold) of culture in MPC1 cells treated with 1,25D. Treatment with 1,25D resulted in a  
394 significant increase in cFGF23 of MPC2 cells at 14 days, but not at 21 days. While no

395 differences were observed in cFGF23 production between MPC1 and MPC2 cells in the  
396 untreated condition, MPC2 cells exposed to 1,25D secreted significantly more cFGF23  
397 compared to treated MPC1 cells at 14 (2.8-fold) and 21 days (3.5-fold) of culture (Fig. 3C), also  
398 consistent with higher *Fgf23* mRNA levels in this line. These data demonstrate that MPC1 and  
399 MPC2 cells produce and secrete iFGF23 and cFGF23 protein that are sensitive to 1,25D.

#### 400 **Adipogenic Differentiation of MPC Cells**

401 Cells of the mesenchymal lineage have the capacity to differentiate into several cell types.  
402 As allocation of MSCs towards the osteogenic and adipogenic lineages are inversely  
403 proportional[18], the ability of a progenitor cell line to differentiate towards both the adipogenic  
404 and osteogenic lineages would present as a useful tool. To determine the ability of MPC cells to  
405 differentiate into adipocytes, MPC1 and MPC2 cells were cultured for 4 days in adipogenic  
406 media or growth media (as described above). Adipogenic differentiation of both MPC1 (Fig. 4A)  
407 and MPC2 (Fig. 4B) cells resulted in increased oil-red-O staining compared to those cultured in  
408 growth media.

409 To quantify the changes in adipogenic differentiation, MPC cells were exposed to growth  
410 media or adipogenic media for 4 days at which time cells were lysed and proteins separated by  
411 SDS PAGE for Western blotting (Fig. 4C). Expression of proteins that control adipogenic  
412 differentiation, or are a by-product thereof were quantified. Adipogenic differentiation of MPC1  
413 cells did not result in significant increases in peroxisome proliferator-activated receptor gamma  
414 (PPAR $\gamma$ ), adiponectin (ADIPOQ), or perilipin (PLIN); however, production of fatty acid binding  
415 protein 4 (FABP4) was significantly increased by 5-fold (Fig. 4D). In contrast to MPC1 cells,  
416 MPC2 cells cultured in adipogenic media had significantly increased expression of adipogenic  
417 differentiation markers including PPAR $\gamma$  (48.7-fold), ADIPOQ (8.5-fold), PLIN (20.3-fold), and  
418 FABP4 (18.7-fold) as shown by densitometry quantification of Western blots (Figs 5D & E).  
419 These data demonstrate that MPC cells are capable of entering into the adipogenic lineage,



420 with MPC2 cells demonstrating greater expression of adipogenic proteins compared to growth  
421 media than MPC1 cells.

## 422 **Chondrogenic Differentiation of MPC Cells**

423 Studies performed using primary chondrocytes are challenging as these cells are limited by  
424 their relatively short life span and the laborious nature of procuring primary cells. Immortalized  
425 cells with the capacity to differentiate into chondrocytes provide a consistent source of cells,  
426 capable of yielding reproducible results, thus decreasing the need for primary cell isolations. As  
427 such, MPC cells were cultured in chondrogenic differentiation media to examine the ability of  
428 these cells to enter into the chondrogenic lineage. MPC1 and MPC2 cells were pelleted and  
429 exposed to growth media or chondrogenic media, as described above. Pellets were embedded  
430 and sectioned followed by staining with Alcian blue and safranin-O. In MPC1 cells, Alcian blue  
431 staining was slightly more abundant when cells were cultured in chondrogenic media, but not  
432 drastically different (Fig. 5A). Safranin-O staining of MPC1 cells cultured in chondrogenic media  
433 was considerably greater than that of cells cultured in growth media (Fig. 5A). MPC2 cells  
434 grown in chondrogenic media displayed increased staining of Alcian blue, but no distinguishable  
435 differences in safranin-O between growth and chondrogenic culture conditions (Fig. 5B).

436 To examine growth under chondrogenic conditions, MPC cells were cultured in pellets as  
437 described, followed by quantification of the pellet size (Fig. 6A). Compared to growth media,  
438 MPC1 cells grown in chondrogenic media displayed a 2.1-fold increase in pellet size (Fig. 6B).  
439 MPC2 cells cultured in chondrogenic media displayed no change in pellet size compared to  
440 those grown in growth media.

441 To determine if exposure to chondrogenic media induced expression of genes associated  
442 with chondrogenesis, MPC cells were cultured in pellets followed by mRNA isolation and qPCR  
443 analysis. In MPC1 cells expression of collagen 1a1 (*Col1a1*), collagen 2a1 (*Col2a1*) (15.3-fold),

444 collagen 10 (*Col10*), aggrecan (*Acan*), cartilage oligomeric matrix protein (*Comp*) (200-fold), and  
445 SRY-box transcription factor 9 (*Sox9*) (89-fold) were all significantly increased when cultured in  
446 chondrogenic media (Fig. 6C). Levels of *Col1a1*, *Col10*, and *Acan* were undetectable in  
447 samples grown in growth media, thus fold-change could not be calculated for those samples. In  
448 MPC2 cells, mRNA expression of *Col1a1* (6,912-fold), *Col10*, *Comp*, and *Sox9* (65.4-fold) were  
449 significantly increased when cultured in chondrogenic media, compared to maintenance growth  
450 media. Levels of *Col10*, *Acan*, and *Comp* mRNAs were undetectable in samples grown in  
451 growth media. No changes in expression of *Col2a1* or *Acan* were observed between growth and  
452 chondrogenic media (Fig. 6D).

453 Cartilaginous pellets formed by MPC1 and MPC2 cells were embedded and sectioned for  
454 immunostaining to examine expression of proteins associated with cartilage development.  
455 MPC1 cells exposed to chondrogenic media had strongly increased expression of aggrecan  
456 (ACAN) (Fig. 7A). No apparent differences were observed in expression of collagen 1 (COL1) or  
457 collagen X (COLX) in MPC1 cells grown in chondrogenic media. Similar to MPC1 cells,  
458 chondrogenic differentiation of MPC2 cells resulted in increased expression of ACAN (Fig. 7B).  
459 While no differences in COL1 expression were observed when MPC2 cells were exposed to  
460 chondrogenic media, immunostaining of COLX was increased in cells grown under  
461 chondrogenic conditions compared to growth media (Fig. 7B). Taken together, these data  
462 demonstrate that MPC cells are capable of developing into cartilage-like structures that exhibit  
463 proteoglycan staining, expression of chondrogenic genes, and production of protein  
464 characteristic of cartilage.

465 In sum, we have developed two novel mesenchymal progenitor cell lines that mimic the *in*  
466 *vivo* ability to differentiate into osteoblasts/osteocytes, adipocytes, and chondrocytes. With the  
467 capability of responding to exogenous stimuli, known to affect the responses of differentiated  
468 cell types, these cells provide a powerful tool to examine responses of progenitors and the

469 differentiated cells. Further, these cells are readily transfected in the undifferentiated state, as  
470 we have shown by transfecting GFP (Fig. S2), enabling gene targeting approaches for  
471 mechanisms-based experiments within differentiated cell types.

472

## 473 **Discussion**

474 Mesenchymal stem cells serve as the progenitors for multiple tissue types, including  
475 adipose, bone, and cartilage. A variety of hormonal, chemical, and physical cues influence  
476 lineage allocation of MSCs; however, studying these individual effects *in vivo* present numerous  
477 challenges. Despite the availability of several methods for the isolation and characterization of  
478 MSCs, obtaining homogenous cultures capable of faithfully replicating bone, cartilage, and fat  
479 cell phenotypes remains challenging. Herein, we describe the development of two novel  
480 progenitor cell lines, MPC1 and MPC2, which serve as a useful tool to study the properties of  
481 mesenchymal progenitors, but also recapitulate the morphological, genetic, and signaling  
482 properties of bone, cartilage, and adipose. These cells can be routinely used to study the factors  
483 regulating the transition between these lineages, as well as the terminally differentiated cell  
484 types produced from differentiation.

485 Immortalization of MPC1 and MPC2 cells was accomplished by the expression of the  
486 temperature sensitive large T-antigen, enabling proliferation at 33°C and differentiation at 37°C.  
487 The ability to restrict proliferation is a useful feature for the study of some cell types. In  
488 particular, osteocytes, which are the terminally differentiated form of osteoblasts, are not  
489 proliferative *in vivo*[19]. Thus, osteocyte cell lines that maintain proliferative capacity may not  
490 fully replicate the osteocyte phenotype. Incorporation of the temperature sensitive large T-  
491 antigen into these cells enables the ability to restrict proliferation at the time point of  
492 choosing[20], which may be equally useful for the study of hypertrophic chondrocytes.

493 In previous work, our group showed that MSCs isolated from mouse bone marrow were  
494 capable of differentiating into mineralized nodules[9]. These stem cell-derived osteocyte (SCD-  
495 O) cultures formed bone-like nodules containing osteocytes which replicated the morphology  
496 and structure of osteocytes in cortical bone. As osteocyte responses rely heavily on connections  
497 to the matrix, this three-dimensional environment is essential for the replication of the *in vivo*  
498 condition. When primary osteocytes are isolated, they are removed from the native matrix  
499 environment which defines their morphology and regulates contextual behavior. Thus, primary  
500 osteocytes grown in culture dishes quickly lose their osteocyte-like features.

501 Alizarin red and alkaline phosphatase staining of MPC cells demonstrated formation of  
502 mineralized bone-like nodules, which were evident as early as 7-14 days. Thus, when grown in  
503 osteogenic conditions MPC cultures mimic the *in vivo* matrix environment. Some of the earlier  
504 produced osteocytic cell lines, such as MLO-Y4 [21] and MLO-A5 [22] are cultured on a  
505 monolayer and thus are also devoid of the matrix environment that is essential for osteocyte  
506 responses. However, there have been several recent cell lines produced that form mineralized  
507 bone-like structures. These include the IDG-SW3 [20], OCY-454 [23], and OmGFP66 [24]. In  
508 particular, after 28 days of culture in osteogenic media OmGFP66 cells formed highly organized  
509 3D bone-like structures that resembled trabeculae. These cultures had well-defined osteocyte  
510 spacing with the characteristic osteocyte morphology [24]. Importantly, MPC1 and MPC2 cells  
511 form mineralized nodules rapidly in culture, providing the matrix environment necessary to  
512 support osteocyte differentiation and production/secretion of osteocyte products. In contrast to  
513 other commonly used osteocytic cell lines, MPC cells did not require collagen coating of culture  
514 dishes to induce or maintain differentiation.

515 In addition to the formation of abundant matrix, MPC cells also produced all of the  
516 characteristic markers of osteocytes including the early osteocyte marker E11. Expression of  
517 genes that are produced in mature osteocytes, including *Sost*, *Dmp1*, *Fgf23*, and *Mepe* were

518 also extremely abundant. Notably, osteogenic differentiation resulted in production of these  
519 osteocyte-specific genes on the order of 2,000 – 22,000-fold higher than in the undifferentiated  
520 stage. Production of these genes at such high levels not only highlights the ability of MPC  
521 cultures to serve as a unique source of osteocytic cells, but also serves as an excellent model to  
522 study the transcriptional regulation of each of these genes. Sclerostin in particular has received  
523 great attention in the last decade as it is an inhibitor of Wnt/Lrp signaling, and the target of the  
524 neutralizing monoclonal Ab romosozumab [25], a drug recently approved to treat osteoporosis.  
525 Our data show that MPC cells treated with PTH have a dramatic reduction of *Sost* expression  
526 as well as *Dmp1*. These results align well with previously published *in vivo* and *in vitro* studies  
527 demonstrating hormonal control of these genes and that MPC cells replicate key functional  
528 responses of osteocytic genes.

529 The osteocyte-produced hormone FGF23 has been studied in a number of cell models. The  
530 MPC cell lines provide a novel system for testing FGF23 biology in regard to this hormone's  
531 expression and actions. MPC cells express FGF23 in response to 1,25D, similar to  
532 osteosarcoma lines such as the rat osteoblast/osteocyte cell line UMR-106 [26,27]. The UMR-  
533 106 line also increased *Fgf23* mRNA when challenged with hypoxia-mimetics [28] and iron  
534 chelation [29]. Further, response elements in *Fgf23* promoter fragments were activated in  
535 response to 1,25D in human K562 leukemia cells [30]. The human osteoblastic cell line U2OS  
536 also properly expressed *Fgf23* cDNA, and gene targeting was used to identify key  
537 glycosylation/phosphorylation events necessary for FGF23 production [31]. The disadvantage of  
538 these lines is that they do not appear to express endogenous FGF23 protein at readily  
539 quantifiable levels.

540 The mouse osteoblast-like cell line MC3T3-E1 has also been used to study FGF23  
541 expression and its possible roles in osteoblast function [32], as well as its promoter elements  
542 [33]. Similar to UMR-106 and U2OS cells; however, the detection of measurable FGF23 protein

543 has been elusive in these cells. Whether the lack of mature protein has to do with portions of the  
544 protein folding/secretory pathways down regulated over time in the cells or the fact that FGF23  
545 can be proteolytically inactivated prior to secretion [29,34] remains unclear. When differentiated,  
546 the MPC cell lines expressed both FGF23 mRNA, and secreted protein as detected by both  
547 'Intact' and 'C-terminal' FGF23 ELISAs. This capability allows the future study of FGF23 protein  
548 processing using inhibitors/activators, as well as the mechanisms underlying secondary  
549 modification of the mature FGF23 protein. Primary cultures of isolated osteoblasts from rodents  
550 also express *Fgf23* mRNA [35]; however, these cells are somewhat limited in that, as for  
551 primary differentiated cells, they are best transfected using specialized viral expression vectors.  
552 Groups have also used differentiated primary bone marrow stromal cells (BMSC) to examine  
553 FGF23 production under hypoxic conditions and in response to pro-inflammatory stimuli [33].  
554 Like primary osteoblasts/osteocytes, these cells are typically transduced with viral vectors, and  
555 can therefore not be easily targeted by standard genomic modifying reagents such as CRISPR.

556 The MPC lines have the distinct advantage that genes can be targeted by standard  
557 transfection techniques during the undifferentiated growth phase, then tested for cell function in  
558 the differentiated osteocyte-like state or as we show, during active mineralization. More recently,  
559 a clonal osteogenic cell line, OmGFP66, was developed by immortalization of primary bone  
560 cells from mice expressing a membrane-targeted GFP driven by the *Dmp1*-promoter [24]. This  
561 line increased FGF23 expression upon differentiation, similar to the MPC lines. FGF23 was also  
562 studied in a model osteocyte-like cell line, IDG-SW3, which demonstrated that <sup>35</sup>S-labeled  
563 FGF23 was cleaved to smaller fragments which were constitutively secreted [36]. In contrast,  
564 intact bioactive FGF23 was more efficiently stored in differentiated than in undifferentiated IDG-  
565 SW3 cells. Following osteogenic differentiation of IDG-SW3 cultures, basal *Fgf23* mRNA was  
566 dose-dependently up-regulated by pro-inflammatory cytokines TNF, IL-1 $\beta$  and TWEAK, and  
567 bacterial LPS [37]. cFGF23 and iFGF23 protein levels also increased, but intact protein only in

568 the presence of furin inhibitors, supporting that FGF23 cleavage controls this hormone's  
569 bioavailability. Further, some osteocyte cell lines, such as MLO-Y4 express negligible levels of  
570 FGF23 in the basal state; however, modest induction can be seen for *Fgf23* mRNA and other  
571 osteocyte genes with culture under 3D conditions. Cell lines of other lineages, including HK2  
572 (Human Kidney-2, proximal tubule-like) cells have been tested, and *Fgf23* and osteopontin  
573 mRNAs were expressed in these cells when incubated with TGF $\beta$ 1; however, these levels were  
574 not altered in HK2 cells when treated with 1,25D and high phosphate levels [38]. Although  
575 FGF23 is not normally expressed to a significant degree in kidney *in vivo*, this cell model may  
576 be useful for testing FGF23 expression under specific pathologic conditions. Thus, the novel  
577 MPC cell lines faithfully recapitulate many of the critical features of osteocytes, and will allow  
578 further understanding of FGF23 transcription, protein modification, and secretion.

579 While there are several cell lines capable of recreating osteoblast and osteocyte  
580 phenotypes, MPC cells provide a distinct advantage with the capability to also differentiate into  
581 the adipogenic and chondrogenic lineages. MPC1 and MPC2 cells readily formed adipocytes  
582 after only 5 days of exposure to adipogenic media, much faster than the 2-3 weeks of  
583 adipogenic differentiation required of other MSC lines [5,6]. MPC2 cells responded to  
584 adipogenic conditions with greater increases in adipogenic proteins compared to MPC1 cells.  
585 MPC2 cells consistently produced high levels of the transcriptional regulator of adipogenesis,  
586 PPAR $\gamma$  as well as other proteins characteristic of adipocytes including adiponectin, perilipin, and  
587 fatty acid binding protein 4. Recent studies have shown that accumulation of adipose tissue  
588 within the bone marrow is detrimental to skeletal health and is associated with aging and disuse  
589 [39,40]. Additionally, use of certain drugs, such as rosiglitazone increase bone marrow  
590 adiposity, but these effects can be attenuated by exercise [41]. Several studies have  
591 demonstrated that the mechanical contribution of exercise restrict entry of mesenchymal  
592 progenitors into the adipogenic lineage [42,43], effects that are influence by actin cytoskeletal

593 organization [10,44,45], and even shuttling of actin monomers to into the nucleus to regulate  
594 YAP/TAZ dynamics [46]. As the balance between osteogenic and adipogenic fate has important  
595 implications for health and disease, MPC cells are a good model to study the genetic and  
596 phenotypic changes governing the balance of these two mesenchymal tissues.

597 Several different culture models have been developed to study chondrocytes *in vitro*  
598 including explant models, three-dimensional culture systems, and cells grown in monolayers [1].  
599 When grown on a monolayer, devoid of the surrounding matrix, primary chondrocytes readily  
600 undergo de-differentiation with progressive loss of collagen type II and aggrecan [47,48].  
601 Culturing chondrocytes within conditions enabling a rounded morphology promotes  
602 maintenance of the chondrocyte phenotype [49,50], as such we allowed MPC cultures to grow  
603 within pellets. MPC cells grew into cartilaginous pellets which stained for both alcian blue and  
604 safranin-O. MPC1 cells demonstrated increased growth capacity compared to MPC2 cells, and  
605 more consistently expressed chondrocyte markers. MPC1 cells exposed to chondrogenic media  
606 produced collagens 1, 2, and 10, as well as the chondrocyte transcription factor Sox9 and the  
607 matrix molecules aggrecan and *Comp*. MPC1 cells also stained strongly for aggrecan protein.  
608 As such, MPC1 cells reproduced the cartilage phenotype more readily than MPC2 cells. Other  
609 cell lines including CFK2, which was established from fetal rat calvariae [51], and ATDC5, an  
610 embryonal carcinoma cell line isolated from a differentiating culture of AT805 teratocarcinoma  
611 [52], reproduce the cartilage phenotype *in vitro*. With the ability to produce cartilage-specific  
612 genes and grow within a 3D environment, MPC cells represent a novel cell line to study  
613 chondrocyte development, particularly the progression from the progenitor stage.

614 While both MPC1 and MPC2 cell lines have several beneficial features, there remain  
615 limitations in the use of these cells. As MPC cells are derived from single cell clones, they are  
616 clonally similar in the undifferentiated state. This characteristic is beneficial to achieve  
617 reproducible results; however, studies seeking to replicate the heterogenous population of the



618 bone marrow niche may opt for a culture system such as the SCD-O [9] which are not clonal nor  
619 immortalized. The immortalized nature of these cells may also be a limitation for some studies,  
620 as the process of introducing the immortalization vector may alter responses. We've attempted  
621 to circumvent this by using the temperature sensitive large T-antigen, thus the proliferative  
622 capacity of the cells can be modulated as needed. Despite some of these limitations, MPC cells  
623 produce very high levels of osteogenic genes, especially *Sost* and *Fgf23*. Few cell lines secrete  
624 FGF23 protein, in particular intact FGF23, a feature that is asset of these cells. In addition to  
625 producing these factors, the ability to MPC cells to differentiate into multiple lineages allows  
626 investigators the opportunity to study the transition between mesenchymal cell types. An  
627 additional strength of this study was that differentiation of MPC cells was achieved across 5  
628 different laboratories. In particular, osteogenic differentiation results were consistent when  
629 performed at the University of Adelaide and at Indiana University. The consistent growth and  
630 differentiation of these cells among several investigators enables greater confidence in  
631 achieving reproducible results, providing increased rigor in future studies.

632 In summary, we generated and characterized two novel multi-potent cell lines useful for the  
633 study of the undifferentiated mesenchymal progenitor state as well as the differentiated  
634 osteoblast/osteocyte, chondrocyte, and adipocyte lineages. When cultured in osteogenic  
635 conditions, these cells produce abundant mineralized matrix and are capable of expressing the  
636 full profile of genes from the MSC precursor, to osteoblast, to osteocytes. MPC cells also quickly  
637 differentiate into fat cells, providing a much faster culture model than many currently available  
638 cell lines. These cells provide a novel tool to study factors that regulate MSC differentiation as  
639 well as the differentiated state of these mesenchymal cell types.

640

641 **Figure Legends**

642 **Figure 1. Time course of osteogenic mineralization for MPC1 and MPC2 cells.** MPC1 (A)  
643 and MPC2 (B) cells were cultured in growth media (GM) or osteogenic media (OM) and stained  
644 with alizarin red to examine mineralization over the differentiation time course. (A) Mineralization  
645 of MPC1 cells cultured in OM began at day 7, which was strongly increased at Day 14, and  
646 even more robust at Day 21. (B) MPC2 cells at Day 7 in OM exhibited more robust staining  
647 compared to MPC1 at the same time. Alizarin red stain in OM continually increased with  
648 duration of differentiation. At day 28 of OM, both cell types developed similar and robust  
649 mineralization. In contrast to MPC1, MPC2 cells exhibited modest mineralization at Day 28  
650 when maintained in the growth media. Each line was tested in triplicate. Images were captured  
651 using a 10X magnification lens.

652

653 **Figure 2. Differentiation of MPC cells abundantly upregulates osteocyte and osteoblast**  
654 **genes.** RNA from both MPC1 (white bars) and MPC2 (gray bars) cells were analyzed for  
655 several key osteoblast and osteocyte genes over the course of osteogenic differentiation and  
656 normalized to  $\beta$ -actin. (A) *Sost* mRNA gradually increased in both cell types over time. MPC2  
657 cells exhibited higher *Sost* mRNA induction at Day 7 compared to MPC1, which normalized at  
658 day 14 and 21. By day 28 MPC1 cells expressed significantly more *Sost* mRNA compared to  
659 MPC2. *Runx2* mRNA levels in undifferentiated cells at Day 0 were modestly elevated in MPC2  
660 cells compared to MPC1. (B) *Dmp1* mRNA was similar at baseline and displayed a dramatic  
661 increase at Day 7 of differentiation in both cell types. MPC2 cells maintained elevated *Dmp1*  
662 levels over MPC1 cells until Day 28. MPC2 cells expressed significantly greater levels of *Dmp1*  
663 compared to MPC1 at 7, 14, and 21 days of culture. (C) *Fgf23* mRNA levels between the cell  
664 lines were similar at Day 0. *Fgf23* mRNA showed a gradual induction over time with  
665 differentiation with both cell types. MPC2 cells maintained elevated *Fgf23* mRNA over MPC1  
666 cells at all time points except for Day 14. (D) *Mepe* mRNA was elevated in MPC2 cells at Day 0  
667 compared to MPC1 cells. With differentiation *Mepe* mRNA significantly rose in MPC2 cells at all

668 time points. For MPC1, *Mepe* expression was only modestly elevated until Day 21. By Day 28  
669 *Mepe* mRNA levels were significantly elevated over MPC2 cells. (E) Compared to MPC1, *E11*  
670 mRNA was highly elevated in MPC2 cells at day 0. With differentiation, MPC1 cells showed a  
671 gradual increase in *E11* mRNA which surpassed expression levels of MPC2 cells at Day 21 and  
672 28. *E11* mRNA was only significantly elevated vs Day 0 in MPC2 cells after Day 21 and 28 of  
673 differentiation. (F) At day 0 *Bglap* mRNA was modestly, but significantly, elevated in MPC2 cells  
674 compared to MPC1. With differentiation, *Bglap* mRNA was dramatically upregulated over time in  
675 both cell types. Significant differences between MPC1 and MPC2 cells were evident at each  
676 time point until Day 28. (G) With differentiation, *Runx2* mRNA significantly increased at day 7 in  
677 both cell types compared to day 0. These levels were maintained both throughout differentiation  
678 and the elevations between MPC2 cells. (n=3; mean + standard deviation). \*p<0.05, \*\*p<0.01,  
679 \*\*\*p<0.001, and \*\*\*\*p<0.0001 between MPC1 and MPC2 at the time point designated; <sup>a</sup>p<0.05,  
680 <sup>b</sup>p<0.01, <sup>c</sup>p<0.001, <sup>d</sup>p<0.0001, and <sup>e</sup>p<0.00001 vs day 0 within the same cell line.

681

682 **Figure 3. Osteogenic MPC1 and MPC2 cells respond to common endocrine factors.** (A)  
683 MPC1 (white bars) and MPC2 cells (gray bars) were differentiated for 28 days in osteogenic  
684 media and subsequently treated with PTH (50 nM), 1,25D (10 nM), or vehicle control (Con) for  
685 48 hours. *Sost* mRNA was significantly suppressed in both cell types with PTH. *Dmp1* mRNA  
686 levels decreased with PTH and increased with 1,25D. *Fgf23* mRNA also decreased with PTH  
687 and increased with 1,25D approximately equally with both cell lines. Owing to the induction of  
688 *Fgf23* mRNA, MPC1 and MPC2 lines were differentiated for 14 or 21 days then exposed to  
689 1,25D (10<sup>-8</sup> M, white bars) or vehicle (DMSO, gray bars) for 24 hours to quantify secreted  
690 FGF23 protein. (B) In MPC1 cells, iFGF23 increased with 1,25D treatment at both 14 and 21  
691 days of differentiation. In MPC2 cells, 1,25D upregulated FGF23 secretion in the media in 21-  
692 day cultures but not at 14 days. (C) Total or cFGF23 was significantly elevated with 1,25D  
693 treatment in MPC1 cells after 14 and 21 days of osteogenic differentiation. In MPC2 cells, 1,25D

694 increased cFGF23 release at 21, but not 14 days. MPC2 cells differentiated for 14 or 21 days  
695 had higher cFGF23 secretion compared to MPC1 cells at the same timepoints. \* $p < 0.05$ ,  
696 \*\* $p < 0.01$ , between Veh and 1,25D at the time point designated; <sup>a</sup> $p < 0.05$ , <sup>b</sup> $p < 0.01$ , <sup>c</sup> $p < 0.001$ , and  
697 <sup>d</sup> $p < 0.0001$  compare PTH or 1,25D treatment to Con treatment within the same cell line; # $p < 0.05$   
698 comparing MPC1 and MPC2 at the same treatment and timepoint.

699

700 **Figure 4. MPC cells undergo robust adipocyte differentiation.** MPC cells were cultured for 4  
701 days in growth media (GM) or adipogenic media (AM). Cells were stained with Oil Red O to  
702 examine lipid accumulation. (A) MPC1 cells grown in AM stained for Oil Red O while cultures in  
703 GM had no staining (bar = 250  $\mu\text{m}$ ). (B) MPC2 cells again showed no evidence of lipid formation  
704 in GM, whereas nearly all of the cells in view were stained with Oil Red O when exposed to AM.  
705 Staining was MPC2 cells was considerably greater than that of MPC1. (C) Protein lysates were  
706 assessed from each cell line and media condition for adipogenic proteins PPAR $\gamma$ , ADIPOQ,  
707 PLIN and FABP4 by Western blotting. (D) Lysates from four biological replicate experiments  
708 were separated by Western blotting and normalized to GAPDH. MPC1 cells only demonstrated  
709 a significant increase in FABP4 in AM conditions (gray bars) compared to GM (white bars).  
710 Significant increases in PPAR $\gamma$ , ADIPOQ, PLIN and FABP4 under AM conditions were  
711 observed in MPC2 cells. \* $p < 0.05$ , \*\*\* $p < 0.001$ , \*\*\*\* $p < 0.0001$ , \*\*\*\*\* $p < 0.00001$  vs GM.

712

713 **Figure 5. MPC1 and MPC2 cells display chondrogenic differentiation.** MPC cells were  
714 grown in pellets in either growth media (GM) or chondrogenic media (CM) for 28 days then  
715 stained for Alcian Blue (AB) and Safranin-O (SO). MPC1 cells show more robust Safranin O  
716 stain under chondrogenic conditions, whereas MPC2 cells displayed strong Alcian Blue staining  
717 in chondrogenic conditions, but no clear differences in Safranin-O. (10X; bar = 250  $\mu\text{m}$ )

718

719 **Figure 6. MPC cells grow into cartilaginous pellets and expression chondrogenic genes.**

720 MPC cells were cultured in growth media (GM) or chondrogenic media (CM) for 28 days. (A)  
721 Under low adherence culture conditions spheroid pellets developed and pellet volumes were  
722 measured. MPC1 cells showed increased pellet volume in chondrogenic conditions (gray bars)  
723 compared to growth media (white bars). There was no change in pellet volume for MPC2 cells.  
724 (B) RNA was analyzed after 28 days of differentiation. For MPC1 cells, chondrogenic conditions  
725 (CM) significantly enhanced mRNA levels of chondrocyte markers *Col1a1*, *Col2a1*, *Col10*,  
726 *Acan*, *Comp*, and *Sox9*. MPC2 cells differentiated with CM showed robust upregulation of  
727 *Col1a1* and *Sox9*. *Col10* and *Comp* mRNA increase was more modest and there was no  
728 change in *Col2a1* and *Acan*. n=3; \*p<0.05, \*\*p<0.01, \*\*\*p<0.001.

729

730 **Figure 7. MPC chondrogenic pellets express cartilaginous proteins.** MPC cell lines were

731 grown into spheroids within 28 days of culture in growth media (GM) or chondrogenic media  
732 (CM). Pellets were sectioned and stained for Aggrecan (ACAN), Type 1 Collagen (COL1) and  
733 Type 10 Collagen (COLX). (A) Pellets from MPC1 cells had increased ACAN staining when  
734 cultured in CM. No apparent changes in COL1 or COLX were observed in MPC1 cells. (B)  
735 MPC2 cells had increased ACAN staining, but less dramatic than MPC1. MPC2 cells showed no  
736 change in COL1 but had enhanced COLX staining. (10X; bar = 250  $\mu$ m)

737 **Figure S1: Osteogenic differentiation and alkaline phosphatase staining of MPC cells.**

738 MPC cells were cultured in growth media (GM) or osteogenic media (OM) and stained for  
739 alkaline phosphatase. (A) In MPC1 cells Alkphos staining began to appear in cultures grown in  
740 osteogenic media at day 14, with large differences at days 21 and 28 compared to growth  
741 media. (B) MPC2 cells displayed strong staining at day 21 in osteogenic media. After 28 days in  
742 culture MPC2 cells grown in growth media also had strong Alkphos staining. Each cell line was  
743 tested in triplicate. Images were captured using a 10X magnification lens.

744 **Figure S2: Transfection with GFP.** To establish the ability of MPC cells to be transfected,  
745 MPC2 cells were cultured in growth media (GM) at 33°C. A vector containing eGFP was  
746 transfected into the cells using Fugene-6 HD. Images were captured using a fluorescent  
747 microscope (Leica) 24 h after transfection. (10X; bar = 200 µm)

748

749

## 750 **References**

- 751 1 Kartsogiannis V, Ng KW. Cell lines and primary cell cultures in the study of bone cell biology  
752 [Review] [in English]. *Mol Cell Endocrinol* 2004;228(1-2):79-102.
- 753 2 Ramakrishnan A, Torok-Storb B, Pillai MM. Primary marrow-derived stromal cells: isolation and  
754 manipulation. *Methods Mol Biol* 2013;1035:75-101.
- 755 3 Ullah I, Subbarao RB, Rho GJ. Human mesenchymal stem cells - current trends and future  
756 prospective. *Biosci Rep* 2015;35(2).
- 757 4 Galarza Torre A, Shaw JE, Wood A et al. An immortalised mesenchymal stem cell line maintains  
758 mechano-responsive behaviour and can be used as a reporter of substrate stiffness. *Scientific*  
759 *reports* 2018;8(1):8981.
- 760 5 Siska EK, Weisman I, Romano J et al. Generation of an immortalized mesenchymal stem cell line  
761 producing a secreted biosensor protein for glucose monitoring. *PloS one* 2017;12(9):e0185498.
- 762 6 Aomatsu E, Takahashi N, Sawada S et al. Novel SCRG1/BST1 axis regulates self-renewal,  
763 migration, and osteogenic differentiation potential in mesenchymal stem cells. *Scientific reports*  
764 2014;4:3652.
- 765 7 Huang S, Xu L, Sun Y et al. An improved protocol for isolation and culture of mesenchymal stem  
766 cells from mouse bone marrow. *J Orthop Translat* 2015;3(1):26-33.
- 767 8 Peister A, Mellad JA, Larson BL et al. Adult stem cells from bone marrow (MSCs) isolated from  
768 different strains of inbred mice vary in surface epitopes, rates of proliferation, and  
769 differentiation potential. Vol 1032004.
- 770 9 Thompson WR, Uzer G, Brobst KE et al. Osteocyte specific responses to soluble and mechanical  
771 stimuli in a stem cell derived culture model. *Scientific reports* 2015;5:11049.
- 772 10 Thompson WR, Yen SS, Uzer G et al. LARG GEF and ARHGAP18 orchestrate RhoA activity to  
773 control mesenchymal stem cell lineage. *Bone* 2018;107:172-180.
- 774 11 Thompson WR, Keller BV, Davis ML et al. Low-Magnitude, High-Frequency Vibration Fails to  
775 Accelerate Ligament Healing but Stimulates Collagen Synthesis in the Achilles Tendon. *Orthop J*  
776 *Sports Med* 2015;3(5).
- 777 12 Cary RL, Waddell S, Racioppi L et al. Inhibition of Ca(2+)-calmodulin-dependent protein kinase  
778 kinase 2 stimulates osteoblast formation and inhibits osteoclast differentiation. *Journal of bone*  
779 *and mineral research : the official journal of the American Society for Bone and Mineral*  
780 *Research* 2013;28(7):1599-1610.

- 781 13 McCoy SY, Falgowski KA, Srinivasan PP et al. Serum xylosyltransferase 1 level increases during  
782 early posttraumatic osteoarthritis in mice with high bone forming potential. *Bone*  
783 2012;51(2):224-231.
- 784 14 Staines KA, Prideaux M, Allen S et al. E11/Podoplanin Protein Stabilization Through Inhibition of  
785 the Proteasome Promotes Osteocyte Differentiation in Murine in Vitro Models. *J Cell Physiol*  
786 2016;231(6):1392-1404.
- 787 15 Komori T, Yagi H, Nomura S et al. Targeted disruption of Cbfa1 results in a complete lack of bone  
788 formation owing to maturational arrest of osteoblasts. *Cell* 1997;89(5):755-764.
- 789 16 Bellido T, Ali AA, Gubrij I et al. Chronic elevation of parathyroid hormone in mice reduces  
790 expression of sclerostin by osteocytes: a novel mechanism for hormonal control of  
791 osteoblastogenesis [in eng]. *Endocrinology* 2005;146(11):4577-4583.
- 792 17 Noonan ML, White KE. FGF23 Synthesis and Activity. *Curr Mol Biol Rep* 2019;5(1):18-25.
- 793 18 Uzer G, Fuchs RK, Rubin J et al. Concise Review: Plasma and Nuclear Membranes Convey  
794 Mechanical Information to Regulate Mesenchymal Stem Cell Lineage. *Stem cells*  
795 2016;34(6):1455-1463.
- 796 19 Prideaux M, Findlay DM, Atkins GJ. Osteocytes: The master cells in bone remodelling. *Curr Opin*  
797 *Pharmacol* 2016;28:24-30.
- 798 20 Woo SM, Rosser J, Dusevich V et al. Cell line IDG-SW3 replicates osteoblast-to-late-osteocyte  
799 differentiation in vitro and accelerates bone formation in vivo. *Journal of bone and mineral*  
800 *research : the official journal of the American Society for Bone and Mineral Research*  
801 2011;26(11):2634-2646.
- 802 21 Kato Y, Windle JJ, Koop BA et al. Establishment of an Osteocyte-like Cell Line, MLO-Y4. *Journal of*  
803 *Bone and Mineral Research* 1997;12(12):2014-2023.
- 804 22 Kato Y, Boskey A, Spevak L et al. Establishment of an osteoid preosteocyte-like cell MLO-A5 that  
805 spontaneously mineralizes in culture. *Journal of bone and mineral research : the official journal*  
806 *of the American Society for Bone and Mineral Research* 2001;16(9):1622-1633.
- 807 23 Spatz JM, Wein MN, Gooi JH et al. The Wnt Inhibitor Sclerostin Is Up-regulated by Mechanical  
808 Unloading in Osteocytes in Vitro. *The Journal of biological chemistry* 2015;290(27):16744-16758.
- 809 24 Wang K, Le L, Chun BM et al. A Novel Osteogenic Cell Line That Differentiates Into GFP-Tagged  
810 Osteocytes and Forms Mineral With a Bone-Like Lacunocanalicular Structure. *Journal of bone*  
811 *and mineral research : the official journal of the American Society for Bone and Mineral*  
812 *Research* 2019;34(6):979-995.
- 813 25 McClung MR, Grauer A, Boonen S et al. Romosozumab in postmenopausal women with low  
814 bone mineral density. *N Engl J Med* 2014;370(5):412-420.
- 815 26 Kolek OI, Hines ER, Jones MD et al. 1alpha,25-Dihydroxyvitamin D3 upregulates FGF23 gene  
816 expression in bone: the final link in a renal-gastrointestinal-skeletal axis that controls phosphate  
817 transport [in eng]. *American journal of physiology Gastrointestinal and liver physiology*  
818 2005;289(6):G1036-1042.
- 819 27 Farrow EG, Davis SI, Ward LM et al. Molecular analysis of DMP1 mutants causing autosomal  
820 recessive hypophosphatemic rickets [in eng]. *Bone* 2009;44(2):287-294.
- 821 28 Hum JM, Clinkenbeard EL, Ip C et al. The metabolic bone disease associated with the Hyp  
822 mutation is independent of osteoblastic HIF1alpha expression. *Bone reports* 2017;6:38-43.
- 823 29 Farrow EG, Yu X, Summers LJ et al. Iron deficiency drives an autosomal dominant  
824 hypophosphatemic rickets (ADHR) phenotype in fibroblast growth factor-23 (Fgf23) knock-in  
825 mice [in eng]. *Proc Natl Acad Sci U S A* 2011;108(46):E1146-1155.
- 826 30 Kaneko I, Saini RK, Griffin KP et al. FGF23 gene regulation by 1,25-dihydroxyvitamin D: opposing  
827 effects in adipocytes and osteocytes. *J Endocrinol* 2015;226(3):155-166.

- 828 31 Tagliabracci VS, Engel JL, Wiley SE et al. Dynamic regulation of FGF23 by Fam20C  
829 phosphorylation, GalNAc-T3 glycosylation, and furin proteolysis. *Proc Natl Acad Sci U S A*  
830 2014;111(15):5520-5525.
- 831 32 Shalhoub V, Ward SC, Sun B et al. Fibroblast Growth Factor 23 (FGF23) and Alpha-Klotho  
832 Stimulate Osteoblastic MC3T3.E1 Cell Proliferation and Inhibit Mineralization [in Eng]. *Calcif*  
833 *Tissue Int* 2011.
- 834 33 David V, Martin A, Isakova T et al. Inflammation and functional iron deficiency regulate  
835 fibroblast growth factor 23 production. *Kidney Int* 2015;22(6):1020-1032.
- 836 34 Benet-Pages A, Lorenz-Depiereux B, Zischka H et al. FGF23 is processed by proprotein  
837 convertases but not by PHEX [in eng]. *Bone* 2004;35(2):455-462.
- 838 35 Liu S, Tang W, Fang J et al. Novel regulators of Fgf23 expression and mineralization in Hyp bone  
839 [in eng]. *Molecular endocrinology* 2009;23(9):1505-1518.
- 840 36 Yamamoto H, Ramos-Molina B, Lick AN et al. Posttranslational processing of FGF23 in osteocytes  
841 during the osteoblast to osteocyte transition. *Bone* 2016;84:120-130.
- 842 37 Ito N, Wijenayaka AR, Prideaux M et al. Regulation of FGF23 expression in IDG-SW3 osteocytes  
843 and human bone by pro-inflammatory stimuli. *Molecular and cellular endocrinology*  
844 2015;399:208-218.
- 845 38 Sugiura H, Matsushita A, Futaya M et al. Fibroblast growth factor 23 is upregulated in the kidney  
846 in a chronic kidney disease rat model. *PLoS One* 2018;13(3):e0191706.
- 847 39 de Abreu MR, Wesselly M, Chung CB et al. Bone marrow MR imaging findings in disuse  
848 osteoporosis. *Skeletal Radiol* 2011;40(5):571-575.
- 849 40 Woods GN, Ewing SK, Sigurdsson S et al. Greater Bone Marrow Adiposity Predicts Bone Loss in  
850 Older Women. *Journal of bone and mineral research : the official journal of the American*  
851 *Society for Bone and Mineral Research* 2020;35(2):326-332.
- 852 41 Styner M, Pagnotti GM, Galior K et al. Exercise Regulation of Marrow Fat in the Setting of  
853 PPARgamma Agonist Treatment in Female C57BL/6 Mice. *Endocrinology* 2015;156(8):2753-  
854 2761.
- 855 42 Sen B, Xie ZH, Case N et al. Mechanical Strain Inhibits Adipogenesis in Mesenchymal Stem Cells  
856 by Stimulating a Durable beta-Catenin Signal [Article] [in English]. *Endocrinology*  
857 2008;149(12):6065-6075.
- 858 43 Styner M, Thompson WR, Galior K et al. Bone marrow fat accumulation accelerated by high fat  
859 diet is suppressed by exercise. *Bone* 2014;64(0):39-46.
- 860 44 Sen B, Xie Z, Case N et al. mTORC2 regulates mechanically induced cytoskeletal reorganization  
861 and lineage selection in marrow-derived mesenchymal stem cells. *Journal of bone and mineral*  
862 *research : the official journal of the American Society for Bone and Mineral Research*  
863 2014;29(1):78-89.
- 864 45 Thompson WR, Guilluy C, Xie Z et al. Mechanically activated Fyn utilizes mTORC2 to regulate  
865 RhoA and adipogenesis in mesenchymal stem cells. *Stem cells* 2013;31(11):2528-2537.
- 866 46 Sen B, Xie Z, Uzer G et al. Intranuclear Actin Regulates Osteogenesis. *Stem cells*  
867 2015;33(10):3065-3076.
- 868 47 Takigawa M, Shirai E, Fukuo K et al. Chondrocytes dedifferentiated by serial monolayer culture  
869 form cartilage nodules in nude mice. *Bone Miner* 1987;2(6):449-462.
- 870 48 Lefebvre V, Garofalo S, Zhou G et al. Characterization of primary cultures of chondrocytes from  
871 type II collagen/beta-galactosidase transgenic mice. *Matrix Biol* 1994;14(4):329-335.
- 872 49 Bonaventure J, Kadhon N, Cohen-Solal L et al. Reexpression of cartilage-specific genes by  
873 dedifferentiated human articular chondrocytes cultured in alginate beads. *Experimental cell*  
874 *research* 1994;212(1):97-104.



875 50 Hauselmann HJ, Fernandes RJ, Mok SS et al. Phenotypic stability of bovine articular  
876 chondrocytes after long-term culture in alginate beads. *Journal of cell science* 1994;107 ( Pt  
877 1):17-27.

878 51 Bernier SM, Goltzman D. Regulation of expression of the chondrocytic phenotype in a skeletal  
879 cell line (CFK2) in vitro. *Journal of bone and mineral research : the official journal of the*  
880 *American Society for Bone and Mineral Research* 1993;8(4):475-484.

881 52 Atsumi T, Miwa Y, Kimata K et al. A chondrogenic cell line derived from a differentiating culture  
882 of AT805 teratocarcinoma cells. *Cell Differ Dev* 1990;30(2):109-116.

883

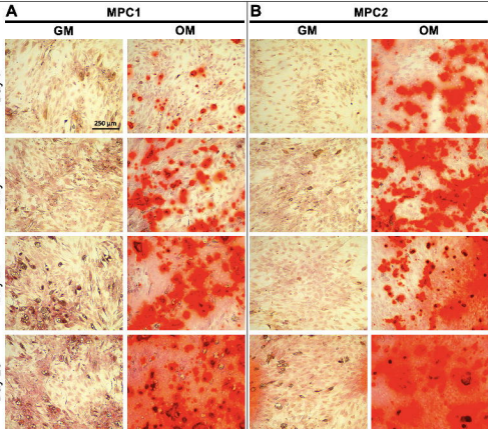

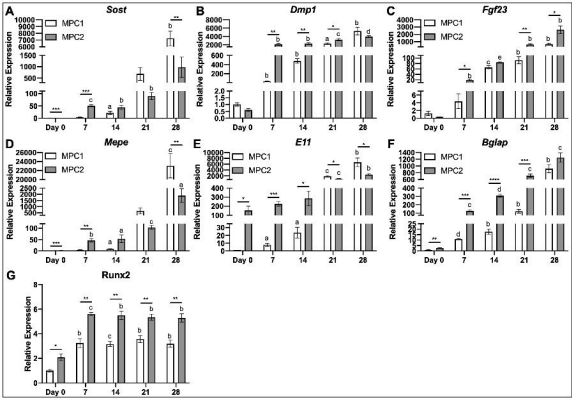

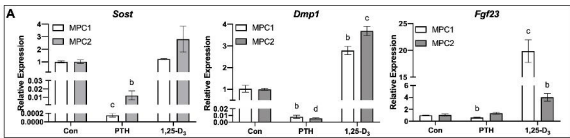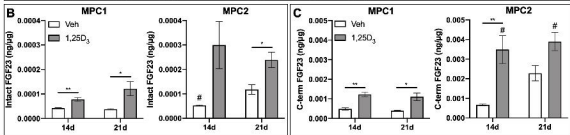

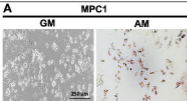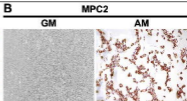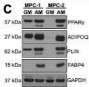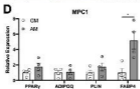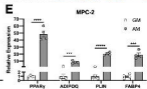

**A****MPC1****GM****CM**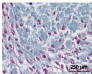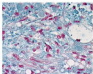**AB**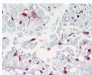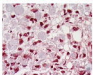**SO****B****MPC2****GM****CM**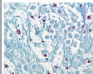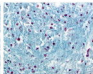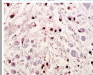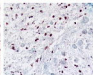

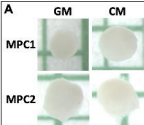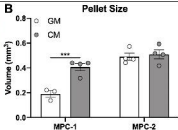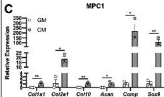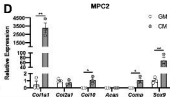

**A****MPC1****GM****CM****ACAN**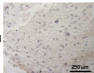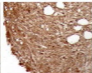**COL1**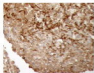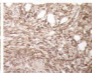**COLX**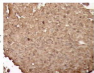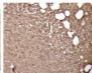**B****MPC2****GM****CM**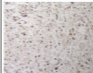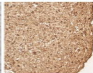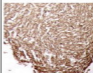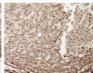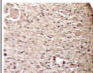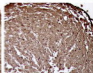

Source: https://www.biorxiv.org/content/10.1101/2020.11.19.385138v1.full.pdf
